# Supplementary material for: Preparation of Au/TiO2 exhibiting strong surface plasmon resonance effective for photoinduced hydrogen formation from organic and inorganic compounds under irradiation of visible light
Source: Royal Society of Chemistry journal article supplement (doi:10.1039/c2cy20108a), 2012-01-01
Supplement: c2cy20108a.pdf [file c2cy20108a.pdf]

Supplementary information for

**Preparation of Au/TiO<sub>2</sub> exhibiting strong surface plasmon resonance effective for photoinduced hydrogen formation from organic and inorganic compounds under irradiation of visible light**

Atsuhiko Tanaka, Satoshi Sakaguchi, Keiji Hashimoto and Hiroshi Kominami\*

*Department of Applied Chemistry, Faculty of Science and Engineering, Kinki University,  
Kowakae, Higashiosaka, Osaka 577-8502, Japan*

**Experimental Section**

*Preparation of Au/TiO<sub>2</sub>*

Nanocrystalline TiO<sub>2</sub> powder was prepared using the HyCOM method at 573 K.<sup>6)</sup> Titanium(IV) butoxide and toluene were used as the starting material and solvent, respectively. The product was calcined at 723 K for 2 h in a box furnace. The crystallinity of HyCOM-TiO<sub>2</sub> sample was improved on calcination and the samples still possessed large specific surface area of 97 m<sup>2</sup>g<sup>-1</sup> even after calcination at 723 K. Loading of 1.0 wt% Au on TiO<sub>2</sub> was performed by the photodeposition method. The TiO<sub>2</sub> powder (198 mg) was suspended in 10 cm<sup>3</sup> of an aqueous solution of methanol (50 vol%) in a test tube and the test tube was sealed with a rubber septum under argon (Ar). An aqueous solution of tetrachloroauric acid (HAuCl<sub>4</sub> as 0.25 wt% Au) was injected into the sealed test tube and then photoirradiated at  $\lambda > 300$  nm by a 400-W high-pressure mercury arc (Eiko-sha, Osaka) with magnetic stirring in a water bath

continuously kept at 298 K. The Au source was reduced by photogenerated electrons, and Au metal was deposited on TiO<sub>2</sub> particles. Analysis of the liquid phase after each photodeposition revealed that the Au source had been almost completely (>99.9%) deposited as Au on the TiO<sub>2</sub> particles. The resultant powder was washed repeatedly with distilled water and then dried at 310 K overnight under air. This photodeposition of Au was repeated twice, third times and four times to obtain 0.50, 0.75 and 1.00 wt% Au/TiO<sub>2</sub> samples, respectively (multi-step photodeposition method). When an aqueous solution of HAuCl<sub>4</sub> corresponding to 1.0 wt% Au was injected and then photoirradiated, the Au source was almost completely (>99.9%) deposited as Au on the TiO<sub>2</sub> particles (single-step photodeposition method).

*Photoinduced hydrogen formation from alcohols in aqueous suspensions of Au/TiO<sub>2</sub> under visible light irradiation*

The dried Au/TiO<sub>2</sub> powder (50 mg) was suspended in 50 vol% alcohol-water solution (5 cm<sup>3</sup>), bubbled with Ar, and sealed with a rubber septum. The suspension was irradiated with visible light of a 500 W xenon (Xe) lamp (Ushio, Tokyo) filtered with a Y-48 filter (AGC Techno Glass) (450-600 nm: 83 mW cm<sup>-2</sup>) with magnetic stirring in a water bath continuously kept at 298 K. The amount of H<sub>2</sub> in the gas phase and the amount of oxidized products in the liquid phase were measured using gas chromatographs.

## Results and discussion

### *Size distribution diagram of the Au nanoparticles*

Figure S1 shows particle size distribution of Au in MS-(1.0)Au/TiO<sub>2</sub> obtained from the TEM photograph. Bimodal particle distribution was clearly observed in the sample.

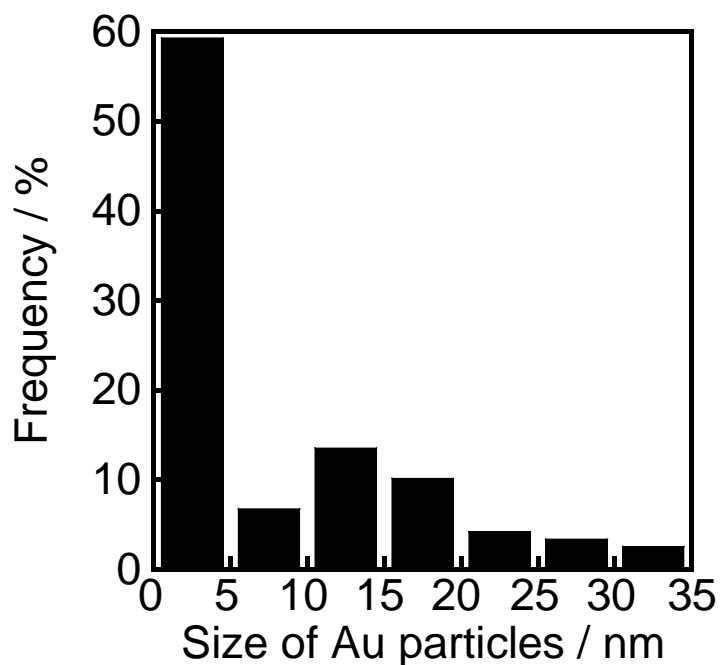

Figure S1 Particle size distribution of MS-(1.00)Au/TiO<sub>2</sub>.
